# Supplementary material
Source: PubMed Central journal article supplement (PMC5994760)
Supplement: NIHMS966176-supplement-Supplemental_material.pdf [file NIHMS966176-supplement-Supplemental_material.pdf]

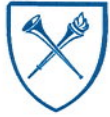

Appendix 1: ARPE-19 cell line authentication report (STR analysis\*): Project code: RHA21235

| Marker  | Allele(s) |     |
|---------|-----------|-----|
| AMELX   | X         | Y   |
| CSF1PO  | 11        |     |
| D13S317 | 11        | 12  |
| D16S539 | 9         | 11  |
| D21S11  | 28        | 29  |
| D5S818  | 13        |     |
| D7S820  | 9         | 11  |
| TH01    | 6         | 9.3 |
| TPOX    | 9         | 11  |
| vWA     | 16        | 19  |

Comments: 100% match with ARPE-19

\*STR analysis was performed by the Emory Integrated Genomics Core (EIGC), Emory University, Atlanta, Georgia, USA. Phone: 404-778-8471. email: [eigc@emory.edu](mailto:eigc@emory.edu).  
<http://www.cores.emory.edu/eigc/>
